# Supplementary material for: Phosphorus Removal and Carbon Dioxide Capture in a Pilot Conventional Septic System Upgraded with a Sidestream Steel Slag Filter
Source: Preprints.org preprint supplement (doi:10.20944/preprints201911.0008.v1), 2019-11-01
Supplement: Supplementary file 1 [file rawdata.xlsx]

## Sheet: raw data
Recirculation ratio	Date	Day	Sampling point	COD (mg/L)	Conductivity (µs/cm)	TSS (mg/L)	VSS (mg/L)	Turbidity (NTU)	TP (mg P/L)	o-PO4 (mg P/L)	pH	Alcalinity (mg CaCO3/L)	DIC (mg C/L)	Ca (mg/L)
0.25	2017-09-06	1	Inf C	264		44	40		3.1	2.22	7.19	418		103
0.25	2017-09-26	20	Inf C	328	1381	60			3.84	3.2	7.19	460		113
0.25	2017-10-05	29	Inf C	435	1377	160	108		5.24	3.07	7.17	476		119
0.25	2017-10-11	35	Inf C	407	1287	50			4.53	3.27	7.17	438		113
0.25	2017-10-25	49	Inf C	317.5	1440	90			4.36	3.43	7.38	466		119
0.25	2017-11-02	57	Inf C	193.5	1108	37	29		2.12	1.11	7.24	364		109
0.25	2017-11-07	62	Inf C	139	1763	50			3.35	2.06	7.38			185
0.25	2017-11-22	77	Inf C	136.5	1583	52			3.7	2.03	7.12	434		80
0.25	2017-11-29	84	Inf C	207.5	1509	53	40		3.22	2.32	7.39			84
0.25	2017-12-07	92	Inf C	148	1597	43			3.31	1.8	7.31	344		71.2
0.5	2018-02-06	153	Inf C	181	1681	38	30		3.5	1.83007	7.43	372	95.5	146
0.5	2018-02-22	169	Inf C	193	1458	52			3.43	3.00654	7.26		84	211
0.5	2018-03-07	182	Inf C	211	1556	58			3.14	1.50327	7.38		92	94
0.5	2018-03-19	194	Inf C	180	1330	32	20		3.14	1.30719	7.07		91.2	117
0.5	2018-03-29	204	Inf C	175	1588	44			2.76		7.33		81.5
0.5	2018-04-04	210	Inf C	198	1698	49	30		2.16	0.947712	7.3		84.9	152
0.5	2018-04-10	216	Inf C	256	1134	40			2.55	1.30719	7.12		86.7	102
0.5	2018-04-18	224	Inf C	340	1352	76			1.69	1.04575	7.35		71	86
0.5	2018-04-27	233	Inf C	213	1589	166			2.83	1.76471	7.1		104	277
0.5	2018-05-03	239	Inf C	182	1630	78			3.44	2.22222	7.12		90.9	146
0.5	2018-05-08	244	Inf C	175	1232	43	34		5.01	3.72549	6.66		95.4	279
0.75	2018-05-15	251	Inf C	245	1388	30			5.09	4.01961	6.78		102.3	216
0.75	2018-05-25	261	Inf C	198	1302	38	29		7.15	4.28105	7.07		101.1	103
0.75	2018-05-30	266	Inf C	166	1468	44			3.75	2.48366	7.59		96.1	142
0.75	2018-06-07	274	Inf C	202	1380	38			3.55	2.15686	7.38		93.1	194
0.25	2017-09-06	1	Eff C	274		27	23		3.51	2.84	7.13	466		102
0.25	2017-09-26	20	Eff C	482	1375	141			5.09	3.82	7.38	506		109
0.25	2017-10-05	29	Eff C	338	1373	92	68		4.82	3?43	7.19	480		111
0.25	2017-10-11	35	Eff C	386	1388	42			5.1	4.25	7.13	524		116
0.25	2017-10-25	49	Eff C	296	1438	70			4.22	2.81	7.46	514		121
0.25	2017-11-02	57	Eff C	243	1315	29	20		3.73	3.17	7.29	500		114
0.25	2017-11-07	62	Eff C	177	1951	41			3.16	1.7	7.34			113
0.25	2017-11-22	77	Eff C	190	1565	52			3.38	2.25	7.03	426		162
0.25	2017-11-29	84	Eff C	217		51	36		3.67	2.55	7.29			119
0.25	2017-12-07	92	Eff C	161	1535	45			4.92	3.04	7.19	363		188.9
0.5	2018-02-06	153	Eff C	191	1644	33	27		3.88	2.32026	7.52	392	107	155
0.5	2018-02-22	169	Eff C	220	1403	58			5.29	3.49673	7.12		133
0.5	2018-03-07	182	Eff C	174	1610	52			3.46	1.56863	7.29		111	143
0.5	2018-03-19	194	Eff C	198	1248	28	18		3.55	1.56863	7.13		114	141
0.5	2018-03-29	204	Eff C	192	1564	48			3.57		7.331		101
0.5	2018-04-04	210	Eff C	187	1620	58	41		2.43	1.43791	7.3		97.1	175
0.5	2018-04-10	216	Eff C	288	1264	34			2.95	2.4183	7.12		102	124
0.5	2018-04-18	224	Eff C	378	1289	68			2.7	1.79739	7.57		85.6	109
0.5	2018-04-27	233	Eff C	230	1578	148			4.09	2.22222	7.16		117	204
0.5	2018-05-03	239	Eff C	186	1676	84			3.55	2.51634	7.11		97.1	173
0.5	2018-05-08	244	Eff C	236	1222	48	38		4.6	3.43137	6.8		98.1	189
0.75	2018-05-15	251	Eff C	188	1344	34			5.17	4.54248	6.87		108	195
0.75	2018-05-25	261	Eff C	164	1345	33	32		7.32	4.60784	7.11		119.7	114
0.75	2018-05-30	266	Eff C	196	1389	38			4.6	3.46405	7.6		112.8	151
0.75	2018-06-07	274	Eff C	188	1420	42			3.69	2.97386	7.31		106.3	196
0.25	2017-09-06	1	Inf S	285.5		38	32		2.97	1.83	7.12	414		97
0.25	2017-09-26	20	Inf S	606	1357	220			4.95	3.3	7.48	496		107
0.25	2017-10-05	29	Inf S	288	1384	82	41		4.62	3.04	7.23	460		123
0.25	2017-10-11	35	Inf S	375.5	1287	37			4.22	3.4	7.21	444		120
0.25	2017-10-25	49	Inf S	349	1455	81			5.95	3.01	7.35	470		120
0.25	2017-11-02	57	Inf S	185.5	1105	31	24			1.14	7.29	370		107
0.25	2017-11-07	62	Inf S	148.5	1757	31			3.28	1.99	7.4			163
0.25	2017-11-22	77	Inf S	173.5	1667	43			3.99	3.3	7.08	434		93
0.25	2017-11-29	84	Inf S	305.5	1505	66	23		4.15	2.22	7.32			86
0.25	2017-12-07	92	Inf S	158	1587	43			3.86	1.54	7.28	374		73.3
0.5	2018-02-06	153	Inf S	170	1653	33	31		2.7	2.32026	7.31	392	94.5	144
0.5	2018-02-22	169	Inf S	185	1453	44			3.47	2.32026	7.22		84.3	87
0.5	2018-03-07	182	Inf S	203	1544	52			3.44	1.53595	7.35		81.9	94
0.5	2018-03-19	194	Inf S	185	1356	36	22		3.1	1.89542	7.18		94.3	118
0.5	2018-03-29	204	Inf S	167	1573	42			3.05		7.28		92.6
0.5	2018-04-04	210	Inf S	195	1679	56	34		2.22	0.980392	7.36		85.5	154
0.5	2018-04-10	216	Inf S	280	1123	33			2.36	1.50327	7.18		88.6	103
0.5	2018-04-18	224	Inf S	307	1342	84			1.67	0.980392	7.06		65.3	87
0.5	2018-04-27	233	Inf S	174	1566	180			2.86	1.76471	7.17		101	255
0.5	2018-05-03	239	Inf S	167	1617	60			4.78	2.87582	7.03		85.3	147
0.5	2018-05-08	244	Inf S	202	1244	39	28		4.81	3.69281	6.62		91.9	246
0.75	2018-05-15	251	Inf S	267	1423	36			4.88	4.15033	6.81		102.8	213
0.75	2018-05-25	261	Inf S	186	1286	42	33		7.31	4.34641	7.29		103.4	105
0.75	2018-05-30	266	Inf S	150	1442	32			3.96	2.51634	7.52		95.75	148
0.75	2018-06-07	274	Inf S	179	1378	48			3.62	1.99346	7.34		96.29	193
0.25	2017-09-06	1	Eff S	261		31	25		2.59	2.1	7.66	424		101.9
0.25	2017-09-26	20	Eff S	445.5	1337	110			4.12	3.86	7.38	484		109
0.25	2017-10-05	29	Eff S	310.5	1342	101	63		4.57	2.88	7.25	456		104
0.25	2017-10-11	35	Eff S	432	1363	80			5.4	4.18	7.21	516		121
0.25	2017-10-25	49	Eff S	304	1437	75			4.89	2.84	7.49	504		118
0.25	2017-11-02	57	Eff S	213	1149	41	33		2.67	1.37	7.47	416		110
0.25	2017-11-07	62	Eff S	170	1916	36			2.64	1.73	7.38			92
0.25	2017-11-22	77	Eff S	145	1709	53			3.33	2.65	7.14	398		117
0.25	2017-11-29	84	Eff S	221	1571	61	46		2.93	1.93	7.66			86
0.25	2017-12-07	92	Eff S	173	1609	41			2.21	0.75	7.76	346		45.4
0.5	2018-02-06	153	Eff S	170	1644	40	36		3.19	2.28758	8.01	368	94.6	149
0.5	2018-02-22	169	Eff S	196	1486	41			1.74	0.490196	7.97		26.8	202
0.5	2018-03-07	182	Eff S	187	1489	50			3.14	0.522876	8.1		102	116
0.5	2018-03-19	194	Eff S	205	1388	32	28		2.88	1.69935	7.89		85.6	104
0.5	2018-03-29	204	Eff S	181	1608	38			2.55		7.78		76.4
0.5	2018-04-04	210	Eff S	192	1589	46	36		2.83	0.816993	7.76		61.6	174
0.5	2018-04-10	216	Eff S	265	1167	34			2.35	1.01307	7.98		75.3	132
0.5	2018-04-18	224	Eff S	340	1338	76			1.76	1.17647	7.71		82.6	92
0.5	2018-04-27	233	Eff S	180	1486	161			2.3	1.50327	7.85		80.8	172
0.5	2018-05-03	239	Eff S	153	1638	56			0.46	1.86275	8.02		5.4	179
0.5	2018-05-08	244	Eff S	210	1264	32	22		3.07	2.15686	7.81		67.4	153
0.75	2018-05-15	251	Eff S	250	1393	33			3.06	2.48366	8.86		65.4	218
0.75	2018-05-25	261	Eff S	175	1262	40	30		4.34	2.28758	8.87		71.1	122
0.75	2018-05-30	266	Eff S	163	1420	29			2.5	1.37255	9.01		51.62	135
0.75	2018-06-07	274	Eff S	143	1398	38			3.15	1.43791	8.73		74.48	181
0.25	2017-09-06	1	SF	249		12	8		0.16	0.33	11.45	392		114
0.25	2017-09-26	20	SF	271	1039	37			0.19	0.26	11.11	362		107
0.25	2017-10-05	29	SF	183	1257	21	7		0.12	0.2	10.98	290		120
0.25	2017-10-11	35	SF	209	1421	21			0.14	0.2	11.46	446		140
0.25	2017-10-25	49	SF	175	1013	30			0.18	0.07	11.14	316		91
0.25	2017-11-02	57	SF	173	1272	5	4		1.94	0.15	11.3	366		111
0.25	2017-11-07	62	SF	161	1330	6			0.18	0.07	11.47			84
0.25	2017-11-22	77	SF	162	1809	7			0.25	0.07	10.89	196		111
0.25	2017-11-29	84	SF	181	1825	13	10		0.27	0.08	11.2			93
0.25	2017-12-07	92	SF	167	1833	8			0.23	0.03	11.33	256		114.9
0.5	2018-02-06	153	SF	127	1528	5	7		0.23	0.218954	11.39	248	4.8	114
0.5	2018-02-22	169	SF	173	1366	6			0.37	0.228758	11.2		3.9	335
0.5	2018-03-07	182	SF	162	1402	10			0.25	0.147059	11.3		3.4	281
0.5	2018-03-19	194	SF	171	1322	8	4		0.3	0.0326797	11.1		5.6	164
0.5	2018-03-29	204	SF	150	1456	5			0.34		11.3		4.8
0.5	2018-04-04	210	SF	183	1368	6	3		0.23	0.0326797	11.4		3.1	230
0.5	2018-04-10	216	SF	198	1026	11			0.22	0.0326797	11.2		4.1	170
0.5	2018-04-18	224	SF	276	1132	13			0.29	0.0326797	11.37		12.7	73
0.5	2018-04-27	233	SF	161	1248	16			0.25	0.0326797	11.3		4	160
0.5	2018-05-03	239	SF	142	1367	7			0.24	0.0326797	11.2		3.4	211
0.5	2018-05-08	244	SF	188	1123	5	6		0.39	0.0326797	11.24		4.2	125
0.75	2018-05-15	251	SF	230	1278	6			0.13	0.0326797	11.1		3.9	273
0.75	2018-05-25	261	SF	170	1118	6	5		0.83	0.0326797	11.1		5.4	125
0.75	2018-05-30	266	SF	145	1239	7			0.56	0.0326797	11.13			75
0.75	2018-06-07	274	SF	130	1245	9			0.37	0.0326797	11.1		5.6	158
0.25	2017-09-06	1	Silica C	86					0.07	0.03	7.85	124		51
0.25	2017-09-26	20	Silica C	21	987			7.73	0.06	0.07	7.5	82		89
0.25	2017-10-05	29	Silica C	17	956			1.34	0.07	0.07	7.43	88		79
0.25	2017-10-11	35	Silica C	25	1190			0.82	0.07	0.07	7.7	122		113
0.25	2017-10-25	49	Silica C	19	1142			1.9	0.06	0.07	7.5	114		102
0.25	2017-11-02	57	Silica C	17	1176			1.79	0.08	0.07	7.6	140		57
0.25	2017-11-07	62	Silica C	20	1320			0.93	0.07	0.07	7.78			90
0.25	2017-11-22	77	Silica C	20	1332			1.73	0.07	0.03	7.76	212		119
0.25	2017-11-29	84	Silica C	19				1.12	0.07	0.03	7.71			200
0.25	2017-12-07	92	Silica C	25	1471			1.33	0.34	0.03	7.66	128		179.1
0.5	2018-02-06	153	Silica C	24	1566			1.12	0.07	0.0326797	7.6	142	28.7	175
0.5	2018-02-22	169	Silica C	24	1123					0.0326797	7.75
0.5	2018-03-07	182	Silica C	17	1320				0.07	0.0326797	7.81		35.4	189
0.5	2018-03-19	194	Silica C	22	987				0.06	0.0326797	7.68		37.5	133
0.5	2018-03-29	204	Silica C	19	1234				0.07		7.88		36.7
0.5	2018-04-04	210	Silica C	26	1256				0.06	0.0326797	7.75		82.9	202
0.5	2018-04-10	216	Silica C	18	1008				0.06	0.0326797	7.9		30.6	197
0.5	2018-04-18	224	Silica C	20	1167				0.07	0.0326797	7.8		51.8	104
0.5	2018-04-27	233	Silica C	22	1323				0.06	0.0326797	7.73			127
0.5	2018-05-03	239	Silica C	25	1545				0.06	0.0326797	7.82		39.2	186
0.5	2018-05-08	244	Silica C	24	813				0.07	0.0326797	7.64		45.2	100
0.75	2018-05-15	251	Silica C	22	1080					0.0326797	7.81		38.8	234
0.75	2018-05-25	261	Silica C	19	1145				0.09	0.0326797	7.79		37.4	148
0.75	2018-05-30	266	Silica C	17	1298				0.14	0.0326797	7.86		38.8	126
0.75	2018-06-07	274	Silica C	18	1359				0.09	0.0326797	7.81		32.7	156
0.25	2017-09-06	1	Limestone C	20					0.07	0.03	7.66	120		334
0.25	2017-09-26	20	Limestone C	10	1340			1.14	0.05	0.07	7.8	112		123
0.25	2017-10-05	29	Limestone C	12	1392			2.21	0.14	0.07	7.88	136		124
0.25	2017-10-11	35	Limestone C	15	1409			1.79	0.21	0.07	7.87	112		131
0.25	2017-10-25	49	Limestone C	14	1339			2.46	0.55	0.07	7.79	130		124
0.25	2017-11-02	57	Limestone C	10	1243			1.48	0.8	0.07	7.95	144		16
0.25	2017-11-07	62	Limestone C	16	1596			0.77	0.94	0.07	7.98			94
0.25	2017-11-22	77	Limestone C	13	1317			1.65	0.97	0.03	7.99	186		158
0.25	2017-11-29	84	Limestone C	12	1721			1.25	1.26	0.03	8.02			112
0.25	2017-12-07	92	Limestone C	17	1413			1.21	1.71	0.06	7.91	108		181.9
0.5	2018-02-06	153	Limestone C	5	1576			1.24	1.3	1.04575	7.85	122	40.2	158
0.5	2018-02-22	169	Limestone C	15	1322					0.424837	7.83
0.5	2018-03-07	182	Limestone C	13	1565				1.72		7.92		33.7	146
0.5	2018-03-19	194	Limestone C	18	1123				1.8		7.77		44.7	122
0.5	2018-03-29	204	Limestone C	16	1489				1.37		8.02		39.5
0.5	2018-04-04	210	Limestone C	9	1502				1.62	1.43791	7.98		41.3	156
0.5	2018-04-10	216	Limestone C	17	1187				1.23	1.30719	8.01		35.7	192
0.5	2018-04-18	224	Limestone C	17	1090				1.32	1.04575	7.88		41.5	109
0.5	2018-04-27	233	Limestone C	12	1234				1.45	1.20915	7.88		38.8	168
0.5	2018-05-03	239	Limestone C	15	1444				1.95	1.63399	8.02		43.2	181
0.5	2018-05-08	244	Limestone C	20	1120				1.79	1.50327	7.97		43	130
0.75	2018-05-15	251	Limestone C	11	1278				2.22	2.28758	8.04		36.8	199
0.75	2018-05-25	261	Limestone C	15	1246				3.11	2.48366	8.01		37.1	147
0.75	2018-05-30	266	Limestone C	12	1209				2.42	1.89542	8		31.3	155
0.75	2018-06-07	274	Limestone C	12	1376				1.73	1.24183	7.99		34.5	178
0.25	2017-09-06	1	Silica S	75					0.08	0.03	7.94	130		58
0.25	2017-09-26	20	Silica S	25	920			0.86	0.05	0.07	7.85	82		77
0.25	2017-10-05	29	Silica S	22	999			1.75	0.05	0.07	7.65	114		100
0.25	2017-10-11	35	Silica S	22	1211			1.97	0.05	0.07	7.8	144		122
0.25	2017-10-25	49	Silica S	20	1153			1.48	0.05	0.07	7.8	122		111
0.25	2017-11-02	57	Silica S	16	1095			0.56	0.06	0.06	7.76	146		105
0.25	2017-11-07	62	Silica S	21	1217			1.79	0.07	0.07	7.86			84
0.25	2017-11-22	77	Silica S	19	1345			1.55	0.07	0.03	7.95	228		133
0.25	2017-11-29	84	Silica S	18	1591			0.97	0.07	0.07	7.87			106
0.25	2017-12-07	92	Silica S	21	1449			1.13	0.07	0.03	7.81	118		93
0.5	2018-02-06	153	Silica S	18	1472			0.98	0.06	0.0326797	7.89	134	30.4	98
0.5	2018-02-22	169	Silica S	22	1206				0.06	0.0326797	7.91
0.5	2018-03-07	182	Silica S	18	1366				0.06	0.0326797	7.88		21.8	186
0.5	2018-03-19	194	Silica S	19	1268				0.06	0.0326797	8.01		22.8	119
0.5	2018-03-29	204	Silica S	21	1433				0.06		7.98		26.3
0.5	2018-04-04	210	Silica S	22	1287				0.08	0.0326797	7.78		26.3	184
0.5	2018-04-10	216	Silica S	17	920				0.06	0.0326797	7.7		29.3	138
0.5	2018-04-18	224	Silica S	15	986				0.06	0.0326797	8		41.9	82
0.5	2018-04-27	233	Silica S	21	1144				0.05	0.0326797	7.93		40	99
0.5	2018-05-03	239	Silica S	19	1255				0.05	0.0326797	7.98
0.5	2018-05-08	244	Silica S	22	986				0.06	0.0326797	8.02		41.3	102
0.75	2018-05-15	251	Silica S	23	1088				0.06	0.0326797	7.85		41.9	218
0.75	2018-05-25	261	Silica S	17	946				0.08	0.0326797	7.96		33.5	126
0.75	2018-05-30	266	Silica S	25	1118				0.11	0.0326797	8.21		33.9	111
0.75	2018-06-07	274	Silica S	22	1032				0.09	0.0326797	8.13		25.2	150
0.25	2017-09-06	1	Limestone S	53					0.05	0.03	7.78	104		319
0.25	2017-09-26	20	Limestone S	18	1631			1.07	0.05	0.07	7.7	78		120
0.25	2017-10-05	29	Limestone S	15	1374			1.51	0.07	0.07	7.8	82		109
0.25	2017-10-11	35	Limestone S	18	1311			1.2	0.11	0.07	7.8	84		110
0.25	2017-10-25	49	Limestone S	19	1301			0.81	0.49	0.07	7.91	106		97
0.25	2017-11-02	57	Limestone S	13	1162			1.22	0.59	0.03	7.9	122		107
0.25	2017-11-07	62	Limestone S	17	1496			1.53	0.53	0.07	8.13			70
0.25	2017-11-22	77	Limestone S	15	1359			1.23	0.74	0.03	8.11	168		12O
0.25	2017-11-29	84	Limestone S	12	1538			0.81	0.98	0.03	8.12			96
0.25	2017-12-07	92	Limestone S	15	1437			1.01	0.84	0.03	7.98	76		100.4
0.5	2018-02-06	153	Limestone S	14	1460			0.76	1.08	0.947712	7.9	88	43	151
0.5	2018-02-22	169	Limestone S	18	1346					0.326797	8.03			87
0.5	2018-03-07	182	Limestone S	13	1448				0.38	0.0326797	7.96		34	234
0.5	2018-03-19	194	Limestone S	15	1288				0.38	0.0326797	8.1		30.4	239
0.5	2018-03-29	204	Limestone S	16	1346				0.85		8.12		32.1
0.5	2018-04-04	210	Limestone S	14	1228				0.58	0.424837	8.04		21.3	222
0.5	2018-04-10	216	Limestone S	19	1202				0.51	0.359477	7.98		25.9	209
0.5	2018-04-18	224	Limestone S	13	1143					0.392157	8.15
0.5	2018-04-27	233	Limestone S	16	1224				0.4	0.326797	8.02		26.7	204
0.5	2018-05-03	239	Limestone S	12	1338					0.392157	8.04
0.5	2018-05-08	244	Limestone S	18	1100				0.71	0.653595	8.16		36.2	143
0.75	2018-05-15	251	Limestone S	15	1266					0.27451	7.99		25.9	219
0.75	2018-05-25	261	Limestone S	16	1080				1.08	0.604575	8.12		26.5	144
0.75	2018-05-30	266	Limestone S	13	1255				1.04	0.777778	8.18		26.4	152
0.75	2018-06-07	274	Limestone S	19	1082				0.866	0.571895	8.14		20.3	178
