# Supplementary material for: Phosphorus Removal and Carbon Dioxide Capture in a Pilot Conventional Septic System Upgraded with a Sidestream Steel Slag Filter
Source: Preprints.org preprint supplement (doi:10.20944/preprints201911.0008.v1), 2019-11-01
Supplement: Supplementary file 1 [file supplementary]

# Phosphorus removal and carbon dioxide capture in a pilot conventional septic system upgraded with a sidestream steel slag filter

## Supplementary Materials

By Dominique Claveau-Mallet<sup>\*,1,2</sup>, Hatim Seltani<sup>1,3</sup> and Yves Comeau<sup>1</sup>

<sup>1</sup>Department of Civil, Geological and Mining Engineering, Polytechnique Montreal, 2900 Edouard-Montpetit blvd, Montreal, Quebec, Canada, H3C 3A7

<sup>2</sup>Department of Chemical Engineering, McGill University, 3610 University Street, Montreal, Quebec, Canada, H3A 0C5

<sup>3</sup>Bionest, 55, 12<sup>th</sup> street, P.O. box 10070, Shawinigan, Quebec, Canada, G9T 5K7

\* corresponding author: Dominique Claveau-Mallet ([dominique.claveau-mallet@polymtl.ca](mailto:dominique.claveau-mallet@polymtl.ca))

This file contains 6 pages, 7 figures and 2 tables.

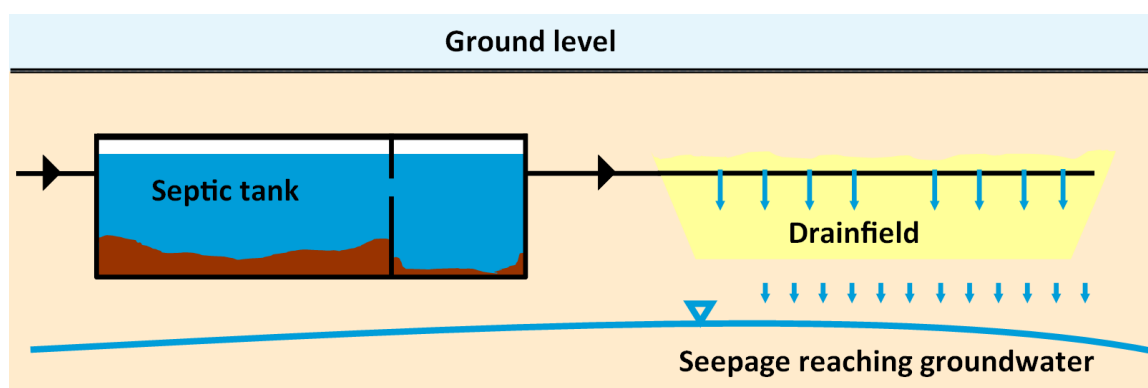

Figure S1: Schematic of a conventional septic system used in decentralized domestic wastewater treatment

Table S1: Drainfield sand properties

| Parameter                   | Units | Silica sand | Limestone sand |
|-----------------------------|-------|-------------|----------------|
| $D_{10}$                    | mm    | 0.5         | 0.55           |
| $C_u$                       | -     | 2.0         | 3.1            |
| Fraction < 80 $\mu\text{m}$ | %     | 0.58        | 0.16           |
| Fraction > 2.5 mm           | %     | 1.4         | 8.4            |

$D_{10}$ : sieve mesh that lets 10% of soil particles pass through the mesh

$C_u$ : uniformity coefficient, defined as  $D_{60}/D_{10}$

$D_{60}$ : sieve mesh that lets 60% of soil particles pass through the mesh

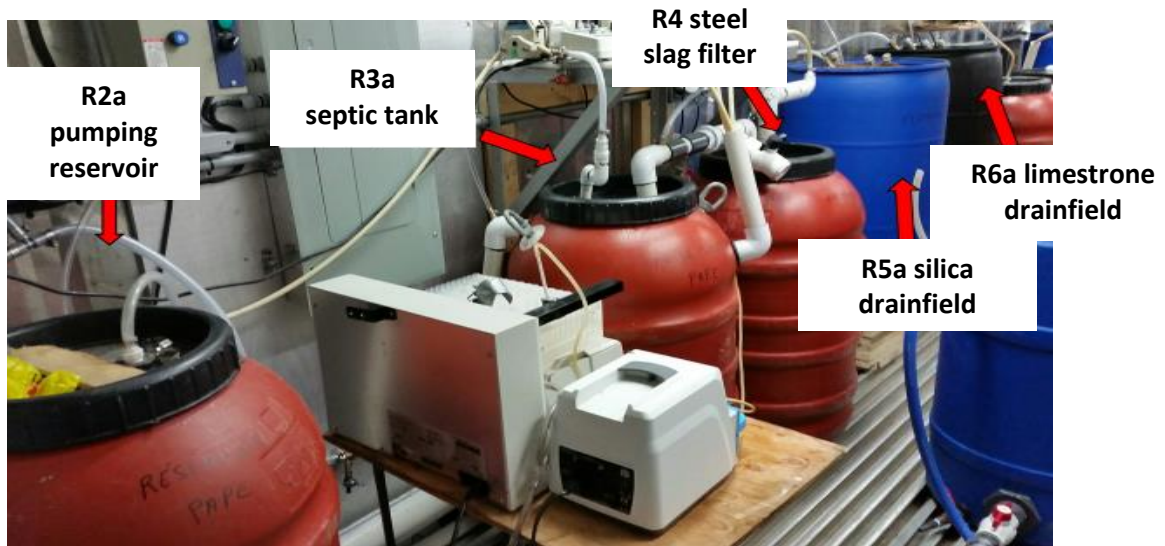

Figure S2: Picture of the septic system with slag filter

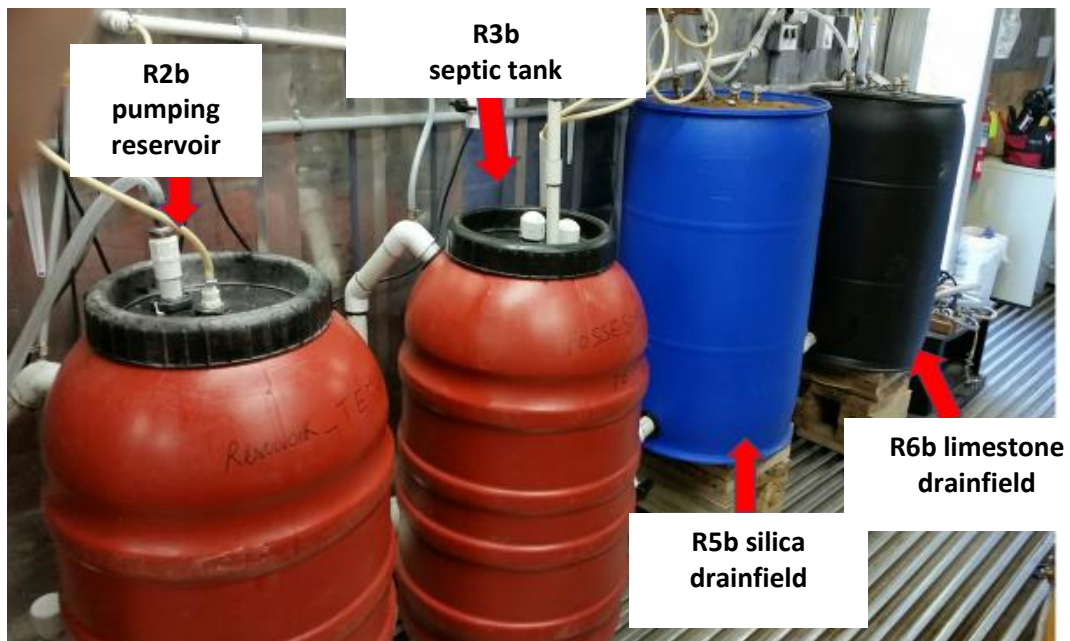

Figure S3: Picture of the control septic system

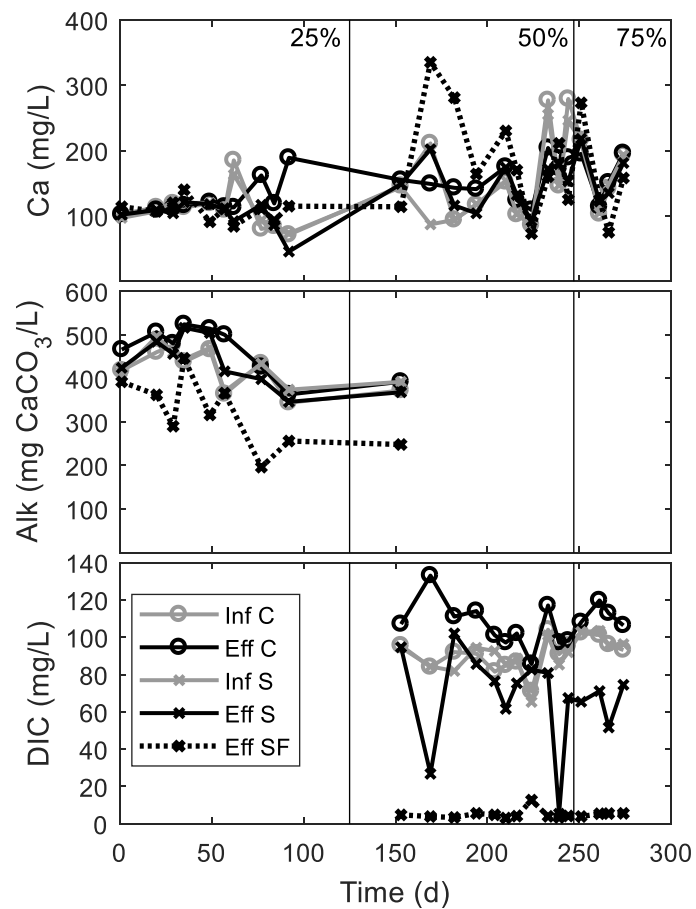

Figure S4: Calcium, alkalinity and dissolved inorganic carbon monitoring in septic tanks without (C) or with (S) slag filter. Inf: influent, Eff: effluent; SF: slag filter. Recirculation ratios are indicated at the top of the Figure and delineated by vertical lines.

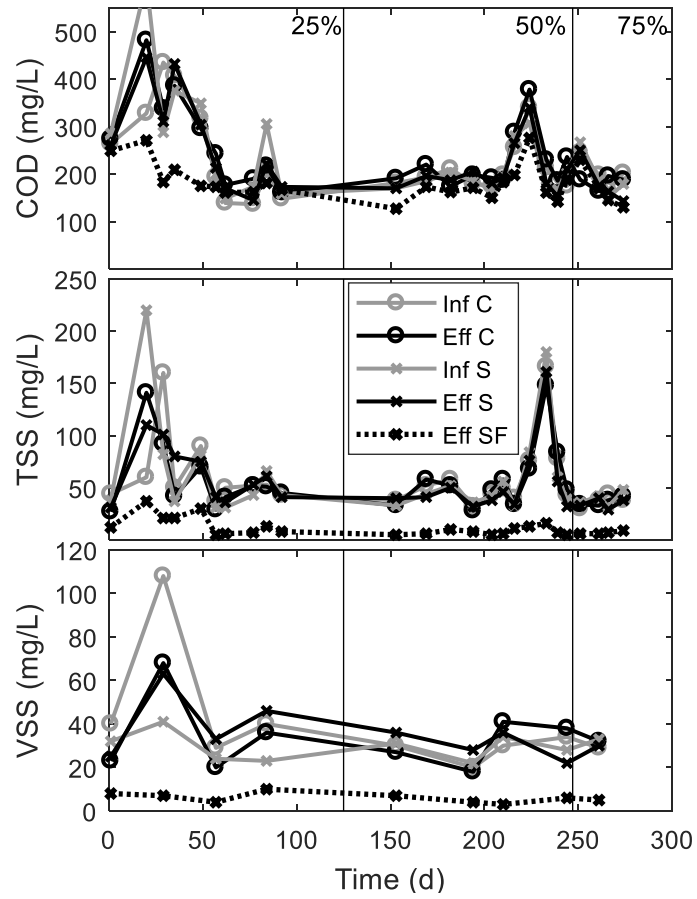

Figure S5: COD, TSS and VSS monitoring in septic tanks without (C) or with (S) slag filter. Inf: influent, Eff: effluent; SF: slag filter. Recirculation ratios are indicated at the top of the Figure and delineated by vertical lines.

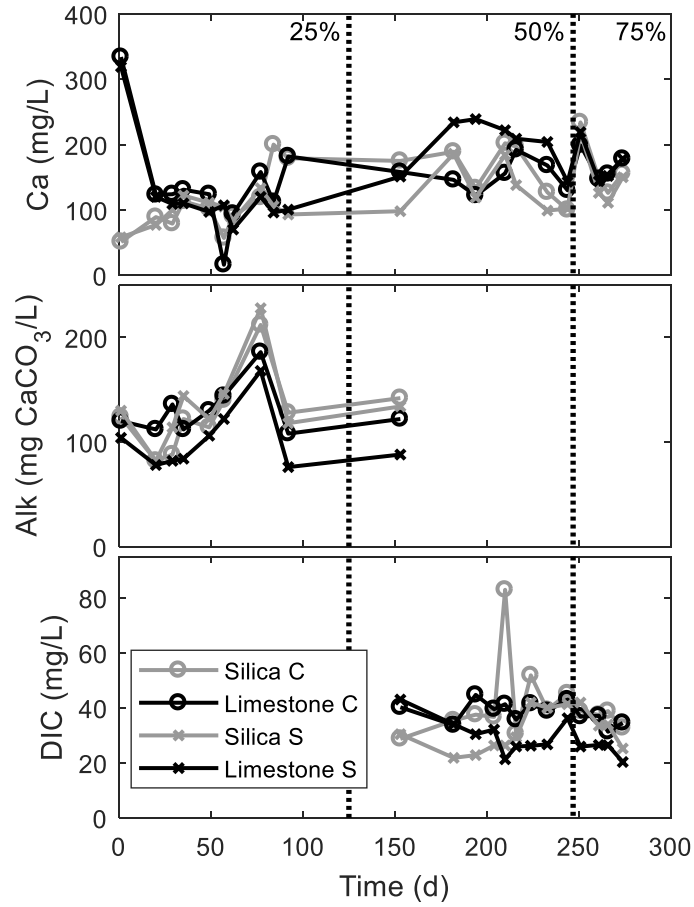

Figure S6: Calcium, alkalinity and dissolved inorganic carbon (DIC) in the effluent of drainfields following septic tanks without (C) or with (S) slag filter. Recirculation ratios are indicated at the top of the Figure and delineated by vertical lines.

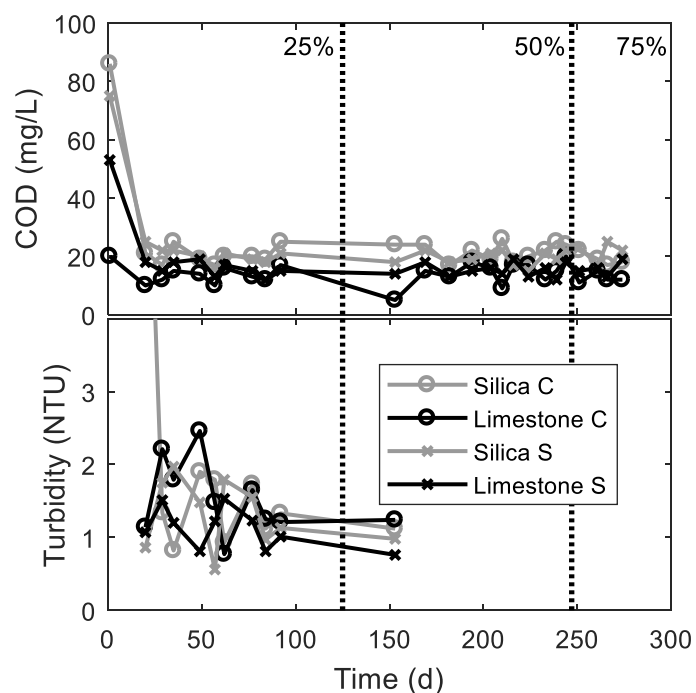

Figure S7: COD and turbidity monitoring at the effluent of drainfields following septic tanks without (C) or with (S) slag filter. Recirculation ratios are indicated at the top of the Figure and delineated by vertical lines.

Table S2: Calibration of the septic tank effluent and the slag filter effluent (mean values in the 50 and 75% recirculation ratio periods)

| Parameter         |        | Septic tank influent |      | Slag filter effluent |       |
|-------------------|--------|----------------------|------|----------------------|-------|
|                   |        | Exp                  | Sim  | Exp                  | Sim   |
| pH                | -      | 7.24                 | 7.24 | 11.22                | 11.22 |
| o-PO <sub>4</sub> | mg P/L | 3.25                 | 3.25 | 0.07                 | 0.02  |
| Ca                | mg/L   | 165                  | 165  | 196                  | 223   |
| DIC               | mg/L   | 100                  | 100  | 4.9                  | 2.1   |
